# Supplementary material
Source: PubMed Central journal article supplement (PMC4976625)

# Supplementary Figure

## A

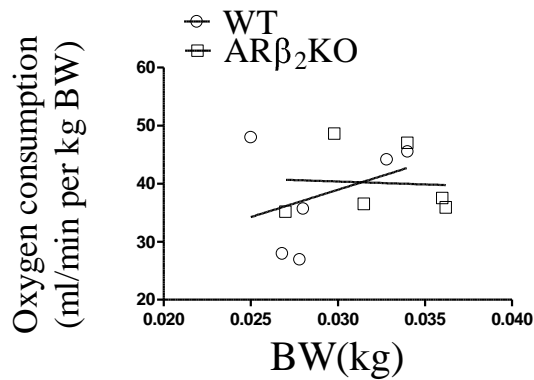

## B

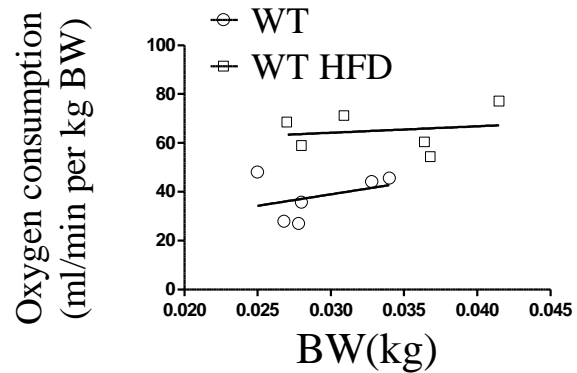

## C

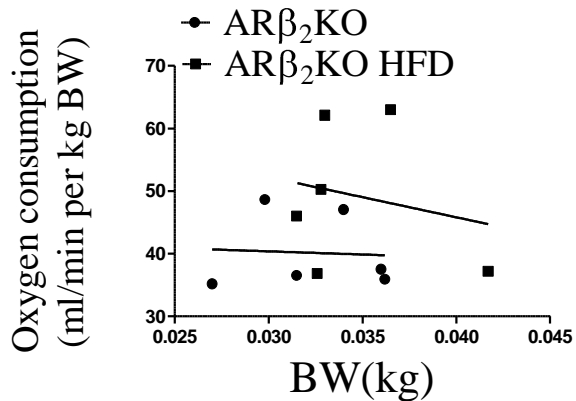

## D

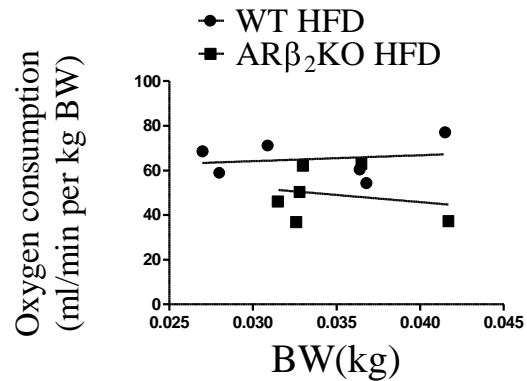

Supplement: NIHMS746320-supplement-supplementary_figure.pdf [file NIHMS746320-supplement-supplementary_figure.pdf]
